# Supplementary material for: Exploring the causal relationship between inflammatory bowel disease and Bell's palsy based on inflammatory proteins: a Mendelian randomization study
Source: Research Square preprint supplement (doi:10.21203/rs.3.rs-6043269/v1), 2025-02-25

**Supplementary Figure 1.** The scatterplot of causal relationship between IBD,CD,and Bell's palsy.

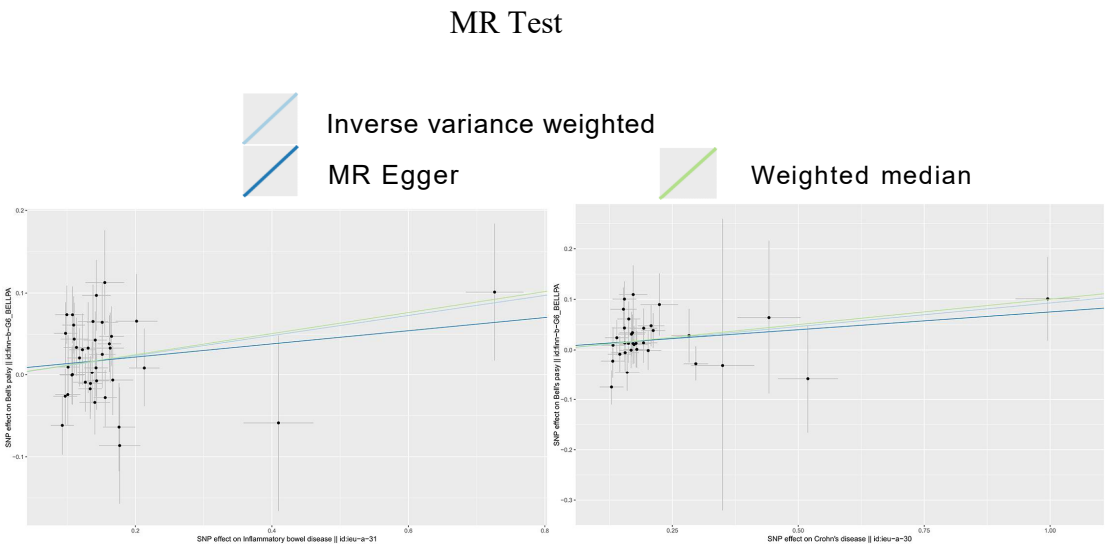

**Supplementary Figure 2.**The funnel plot of causal relationship between IBD,CD,and Bell's palsy.

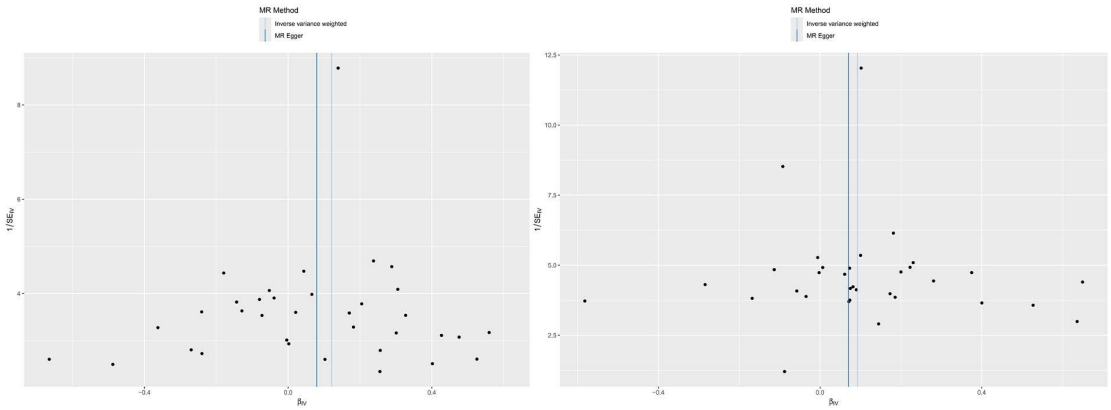

**Supplementary Figure 3.** The leave-one-out plot of causal relationship between IBD, CD, and Bell's palsy

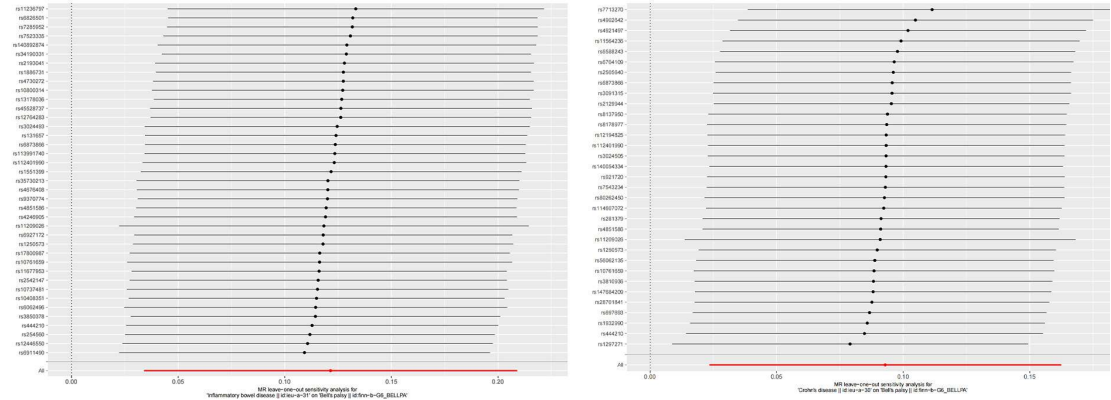

**Supplementary Figure4.** PPI network diagram of inflammatory factors potentially associated with Bell's palsy

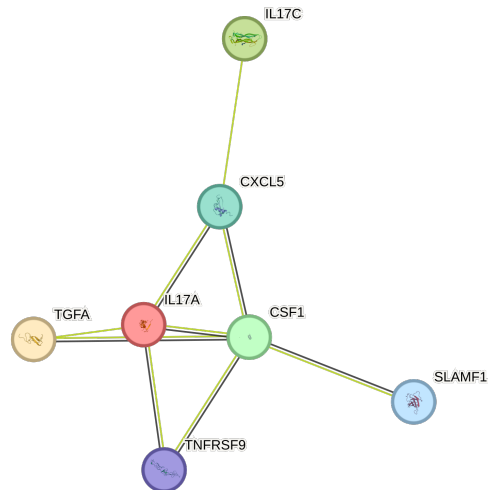

**Supplementary Figure5.** PPI network diagram of inflammatory factors potentially associated with inflammatory bowel disease

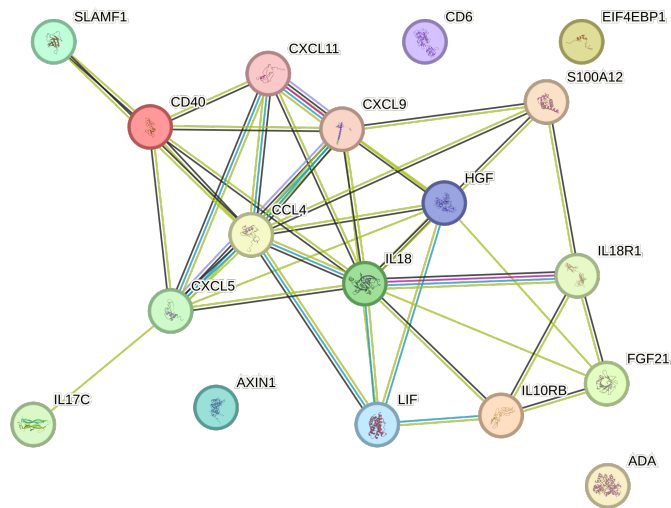

Supplement: Supplementary file [file ce48abc38416e209be87829e.pdf]
